# Supplementary material for: Process optimisation for NASICON-type solid electrolyte synthesis using a combination of experiments and bayesian optimisation
Source: Royal Society of Chemistry journal article supplement (doi:10.1039/d2ma00731b), 2022-01-01
Supplement: d2ma00731b1.pdf [file d2ma00731b1.pdf]

# Supporting information

## **Process Optimization for NASICON type solid electrolyte synthesis using combination of experiments and Bayesian optimization**

Hayami Takeda<sup>1</sup>, Koki Nakano<sup>1</sup>, Hiroko Fukuda<sup>1</sup>, Naoto Tanibata<sup>1</sup>, Masanobu Nakayama<sup>1</sup> Yasuharu Ono<sup>2</sup>, Takaaki Natori<sup>2</sup>

*<sup>1</sup> Department of Advanced Ceramics, Nagoya Institute of Technology, Gokiso, Showa, Nagoya, Aichi 466-8555, Japan*

*<sup>2</sup> TOAGOSEI CO.,LTD., General Center of R&D, 8, Showa-cho, Minato-ku, Nagoya, 455-0026, Japan*

**Keywords :** Battery, NASICON,  $\text{LiZr}_2(\text{PO}_4)_3$ , Solid State Electrolyte, Bayesian Optimization, Process optimization

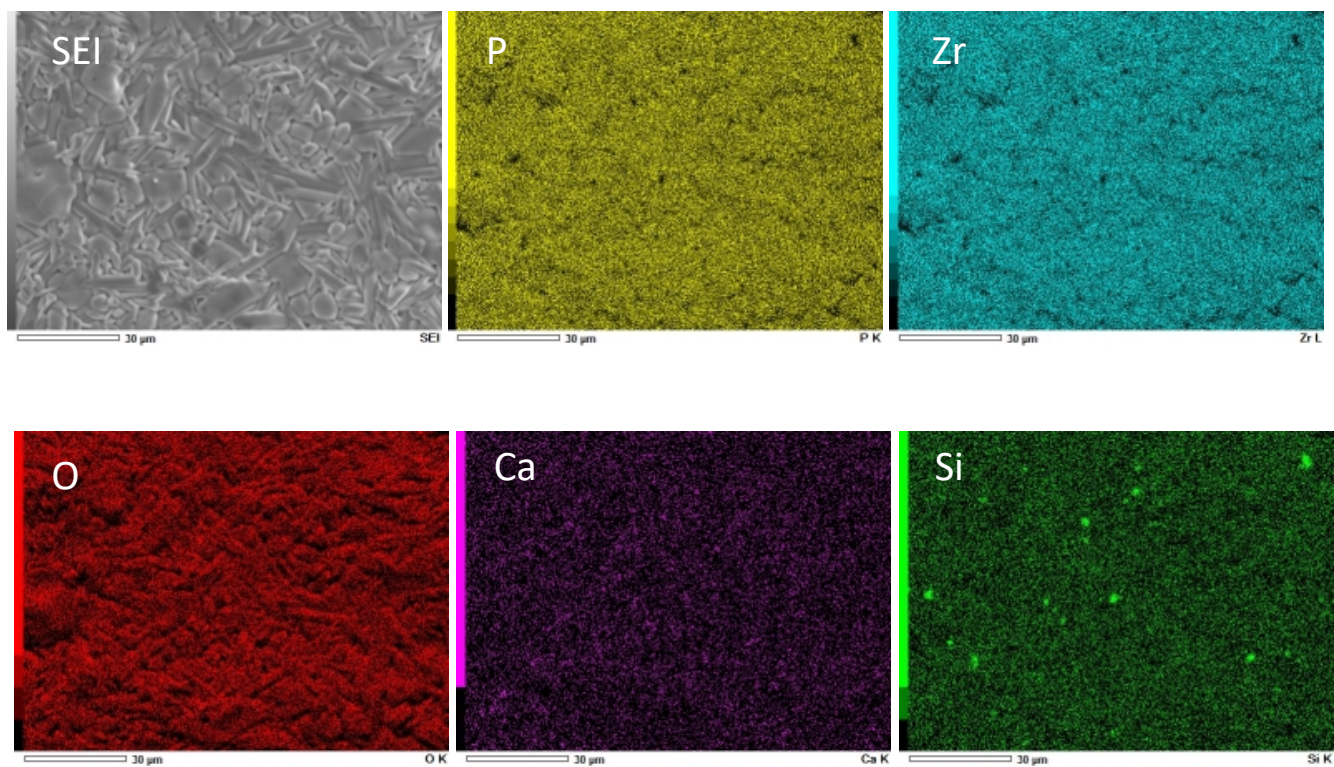

**Figure S1.** the mapping image of the elemental analysis of HC -1050-1100 obtained EDS. phosphate(yellow), zirconium(blue), oxygen(red), calcium(pink), silicon(green)

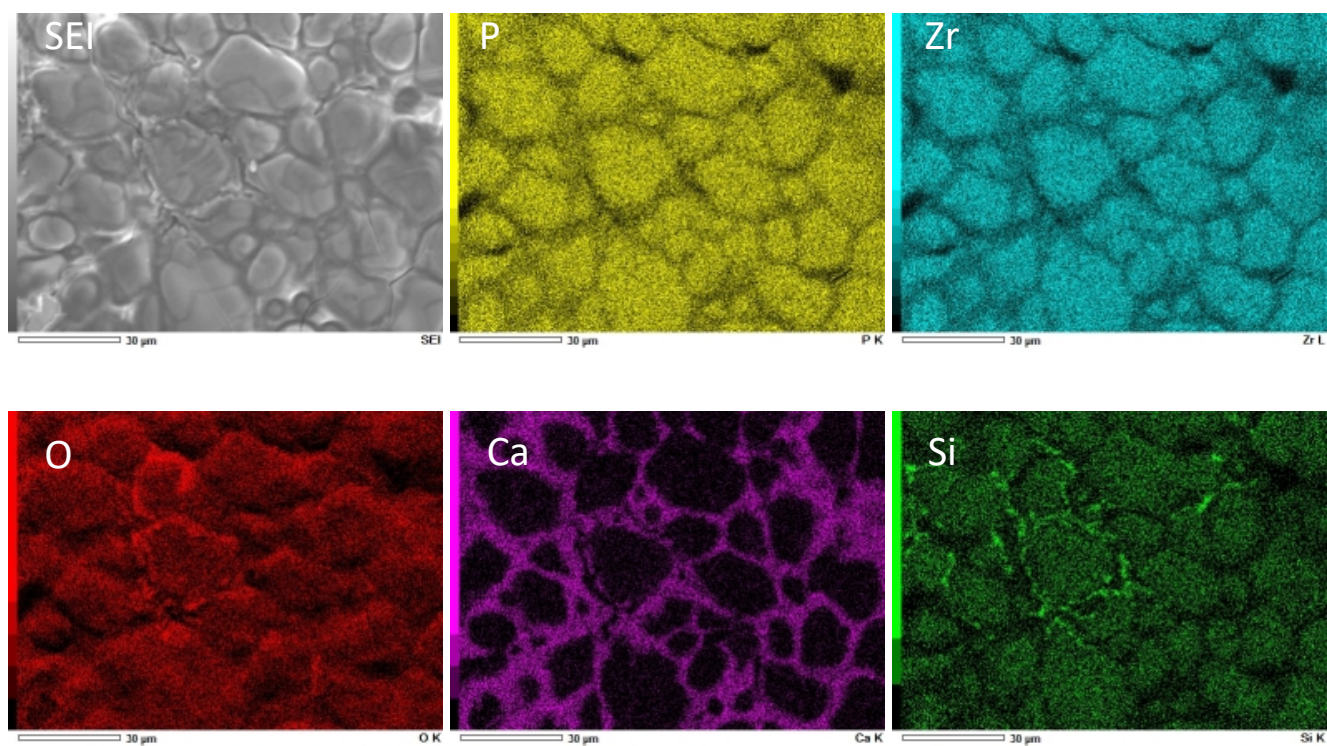

**Figure S2.** the mapping image of the elemental analysis of HC -1050-1250 obtained EDS. phosphate(yellow), zirconium(blue), oxygen(red), calcium(pink), silicon(green)

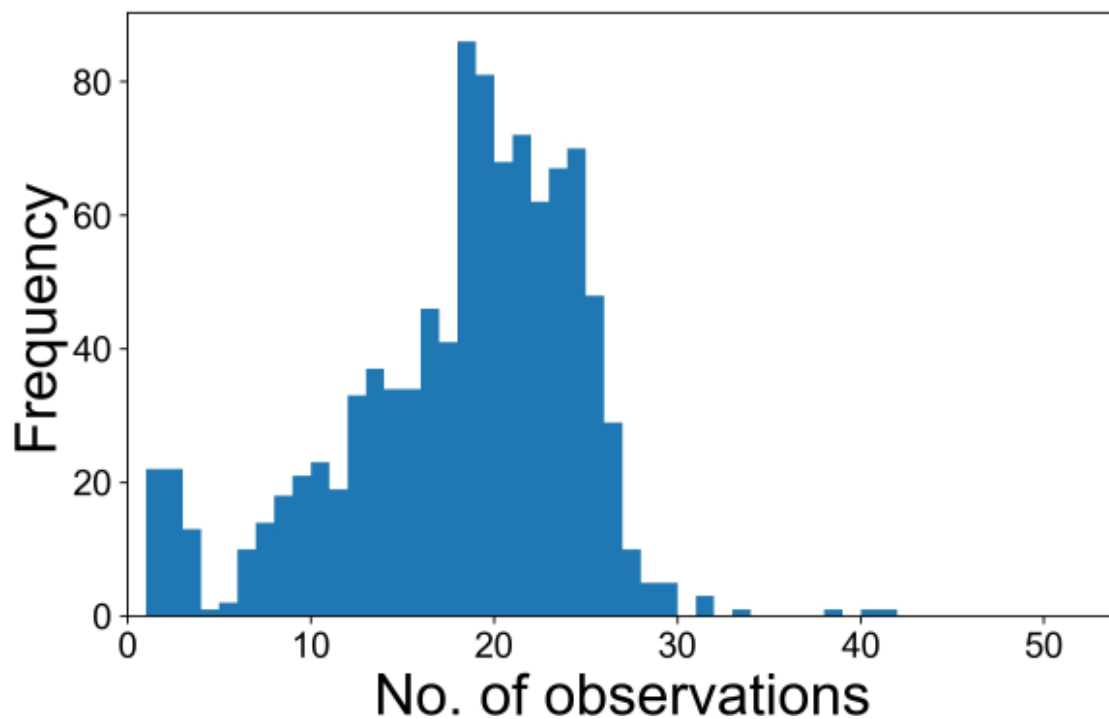

**Figure S3.** Histogram of the number of observations required to determine the heating conditions affording the highest ionic conductivity

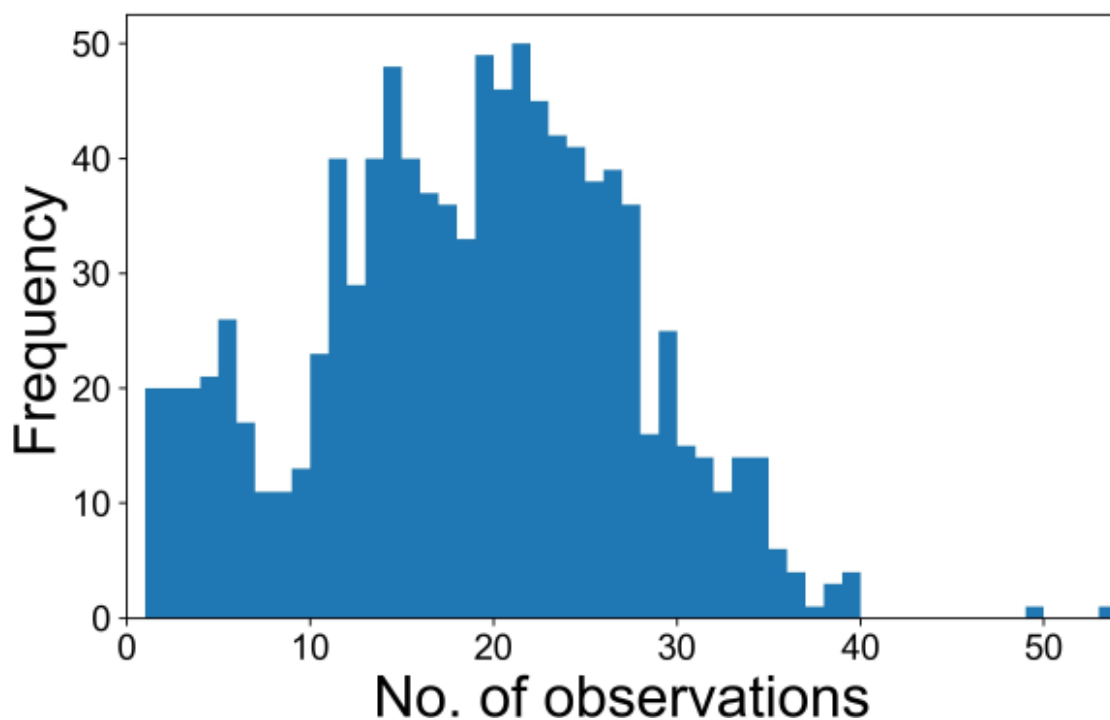

**Figure S4.** Histogram of the number of observations required to determine the heating conditions affording the lowest activation energy.

Table S1. Bulk densities, ionic conductivities at 30, 60, and 90 °C, and activation energies experimentally determined for all 54 samples.

| 1st heating (°C) | 2nd heating (°C) | Bulk density (g/cm <sup>3</sup> ) | Ion conductivity @ 30°C (S/cm) | Ion conductivity @ 60°C (S/cm) | Ion conductivity @ 90°C (S/cm) | Activation energy (eV) |
|------------------|------------------|-----------------------------------|--------------------------------|--------------------------------|--------------------------------|------------------------|
| 900              | 1100             | 2.845                             | 1.72E-06                       | 1.01E-05                       | 4.28E-05                       | 0.51                   |
| 900              | 1150             | 2.714                             | 1.81E-05                       | 7.98E-05                       | 1.77E-04                       | 0.36                   |
| 900              | 1200             | 2.836                             | 2.06E-05                       | 7.92E-05                       | 2.35E-04                       | 0.39                   |
| 900              | 1250             | 2.74                              | 1.52E-05                       | 5.73E-05                       | 1.58E-04                       | 0.37                   |
| 900              | 1300             | 2.612                             | 2.26E-05                       | 8.56E-05                       | 2.49E-04                       | 0.38                   |
| 900              | 1350             | 2.6                               | 1.19E-05                       | 4.15E-05                       | 1.13E-04                       | 0.36                   |
| 950              | 1100             | 2.825                             | 1.50E-06                       | 8.23E-06                       | 3.46E-05                       | 0.5                    |
| 950              | 1150             | 2.744                             | 3.36E-06                       | 1.79E-05                       | 6.05E-05                       | 0.46                   |
| 950              | 1200             | 2.764                             | 1.73E-05                       | 6.39E-05                       | 1.75E-04                       | 0.37                   |
| 950              | 1250             | 2.769                             | 2.38E-05                       | 8.72E-05                       | 2.33E-04                       | 0.36                   |
| 950              | 1300             | 2.689                             | 1.91E-05                       | 6.81E-05                       | 1.79E-04                       | 0.36                   |
| 950              | 1350             | 2.686                             | 1.21E-05                       | 4.08E-05                       | 1.11E-04                       | 0.35                   |
| 1000             | 1100             | 2.957                             | 1.32E-06                       | 7.61E-06                       | 3.32E-05                       | 0.51                   |
| 1000             | 1150             | 2.81                              | 5.43E-06                       | 2.12E-05                       | 6.88E-05                       | 0.4                    |
| 1000             | 1200             | 2.785                             | 1.36E-05                       | 4.94E-05                       | 1.36E-04                       | 0.36                   |
| 1000             | 1250             | 2.779                             | 2.68E-05                       | 6.88E-05                       | 2.12E-04                       | 0.33                   |
| 1000             | 1300             | 2.71                              | 1.91E-05                       | 5.61E-05                       | 1.80E-04                       | 0.35                   |
| 1000             | 1350             | 2.463                             | 1.22E-05                       | 4.55E-05                       | 1.30E-04                       | 0.37                   |
| 1050             | 1100             | 2.837                             | 1.43E-06                       | 8.46E-06                       | 3.66E-05                       | 0.51                   |
| 1050             | 1150             | 2.819                             | 2.07E-06                       | 1.06E-05                       | 4.47E-05                       | 0.49                   |
| 1050             | 1200             | 2.827                             | 5.61E-06                       | 2.13E-05                       | 8.56E-05                       | 0.43                   |
| 1050             | 1250             | 2.768                             | 3.32E-05                       | 9.30E-05                       | 2.62E-04                       | 0.33                   |
| 1050             | 1300             | 2.815                             | 2.46E-05                       | 7.26E-05                       | 2.00E-04                       | 0.33                   |
| 1050             | 1350             | 2.822                             | 2.60E-05                       | 9.84E-05                       | 2.20E-04                       | 0.34                   |
| 1100             | 1100             | 2.923                             | 1.49E-06                       | 8.37E-06                       | 3.56E-05                       | 0.5                    |
| 1100             | 1150             | 2.808                             | 3.75E-06                       | 2.04E-05                       | 7.56E-05                       | 0.48                   |
| 1100             | 1200             | 2.825                             | 2.23E-05                       | 7.29E-05                       | 2.11E-04                       | 0.35                   |
| 1100             | 1250             | 2.736                             | 2.15E-05                       | 7.37E-05                       | 2.09E-04                       | 0.36                   |
| 1100             | 1300             | 2.795                             | 1.42E-05                       | 4.11E-05                       | 1.27E-04                       | 0.34                   |
| 1100             | 1350             | 2.767                             | 1.75E-05                       | 5.21E-05                       | 1.41E-04                       | 0.33                   |
| 1150             | 1100             | 2.917                             | 6.48E-07                       | 4.30E-06                       | 1.94E-05                       | 0.54                   |
| 1150             | 1150             | 2.803                             | 3.73E-06                       | 2.26E-05                       | 8.60E-05                       | 0.5                    |
| 1150             | 1200             | 2.89                              | 1.48E-05                       | 5.64E-05                       | 1.67E-04                       | 0.38                   |
| 1150             | 1250             | 2.779                             | 2.00E-05                       | 7.56E-05                       | 2.12E-04                       | 0.37                   |
| 1150             | 1300             | 2.766                             | 1.69E-05                       | 5.71E-05                       | 1.68E-04                       | 0.36                   |
| 1150             | 1350             | 2.706                             | 1.94E-05                       | 6.49E-05                       | 1.68E-04                       | 0.34                   |
| 1200             | 1100             | 2.94                              | 6.36E-07                       | 4.28E-06                       | 1.93E-05                       | 0.54                   |
| 1200             | 1150             | 2.833                             | 6.84E-06                       | 3.11E-05                       | 9.73E-05                       | 0.42                   |
| 1200             | 1200             | 2.868                             | 1.26E-05                       | 5.09E-05                       | 1.46E-04                       | 0.39                   |
| 1200             | 1250             | 2.779                             | 2.43E-05                       | 6.42E-05                       | 1.78E-04                       | 0.31                   |
| 1200             | 1300             | 2.844                             | 1.64E-05                       | 4.88E-05                       | 1.42E-04                       | 0.34                   |
| 1200             | 1350             | 2.676                             | 1.37E-05                       | 4.86E-05                       | 1.24E-04                       | 0.35                   |
| 1250             | 1100             | 2.997                             | 8.00E-07                       | 4.96E-06                       | 2.17E-05                       | 0.52                   |
| 1250             | 1150             | 2.904                             | 1.27E-05                       | 5.16E-05                       | 1.48E-04                       | 0.39                   |
| 1250             | 1200             | 2.835                             | 1.42E-05                       | 5.16E-05                       | 1.51E-04                       | 0.37                   |
| 1250             | 1250             | 2.824                             | 2.06E-05                       | 6.01E-05                       | 1.48E-04                       | 0.31                   |
| 1250             | 1300             | 2.804                             | 1.69E-05                       | 6.45E-05                       | 1.76E-04                       | 0.37                   |
| 1250             | 1350             | 2.699                             | 1.53E-05                       | 5.80E-05                       | 1.45E-04                       | 0.36                   |
| 1300             | 1100             | 2.968                             | 7.73E-07                       | 4.96E-06                       | 2.10E-05                       | 0.52                   |
| 1300             | 1150             | 2.939                             | 1.01E-05                       | 3.90E-05                       | 1.15E-04                       | 0.38                   |
| 1300             | 1200             | 2.817                             | 8.12E-06                       | 3.23E-05                       | 9.99E-05                       | 0.4                    |
| 1300             | 1250             | 2.786                             | 1.92E-05                       | 6.14E-05                       | 1.57E-04                       | 0.33                   |
| 1300             | 1300             | 2.798                             | 1.70E-05                       | 6.33E-05                       | 1.62E-04                       | 0.36                   |
| 1300             | 1350             | 2.728                             | 1.48E-05                       | 5.12E-05                       | 1.35E-04                       | 0.35                   |
